# Supplementary material
Source: HighWire-hosted journal article supplement (https://www.rcpjournals.org/highwire/filestream/13943/field_highwire_adjunct_files/0/Guest_supplementary_material_S1.pdf)
Supplement: Guest_supplementary_material_S1.pdf [file Guest_supplementary_material_S1.pdf]

## **Appendix a. Learning Objectives of Applied Pharmacology**

### **Brief Description**

The Applied Pharmacology module starts with the basic principles of pharmacology including the basics of pharmacodynamics and pharmacokinetics. The principles of clinical pharmacology will be covered including using medicines to treat disease, medicines and the law, how to write a prescription, and drug administration.

Alongside the pharmacology lectures, you will concurrently learn about medications and build a formulary. Your formulary will start with the Core Drug List for PAs, which you will build from sessions in this module and others, your GP placements, and self-directed learning,

### **Aims**

This module will enable students to develop a greater knowledge and understanding of drugs widely used in clinical practice. This will enhance the student's own practice, as they will be able to monitor and assess more effectively overall drug response, with resultant benefit to patient care.

### **Learning Outcomes**

**On successful completion of the module, students should be able to:**

- Define and explain the basics of pharmacodynamics
- Define and explain the basics of pharmacokinetics
- Describe the relationship between pharmacodynamics and pharmacokinetics
- Identify commonly used medications in healthcare and recognise their indications, adverse effects, cautions, monitoring requirements, contra-indications and interactions
- Explain the essential components of a medication review
- Outline the key factors that need to be considered before deciding on using medication to treat disease
- Outline essential information that needs to be provided to patients when deciding on using medication to treat disease
- Describe the role of Physician Associates and other healthcare professionals in the pharmacological management of patients
- Explain the different types of prescriptions in different clinical settings
- Describe the different routes of drug administration
- Understand the process of clinical trials
- Explain the importance of evidence-based practice with respect to medical treatment
- Demonstrate ability to calculate drug doses
